# Supplementary material for: In vivo High-Content Screening in Zebrafish for Developmental Nephrotoxicity of Approved Drugs
Source: Front Cell Dev Biol. 2020 Jul 10;8:583. doi: 10.3389/fcell.2020.00583 (PMC7366291; doi:10.3389/fcell.2020.00583)
Supplement: PRESENTATION S1.ZIP — Supplementary Software 1.zip. [file Presentation_1.ZIP]

Archive with 2 entries (1 files):
- M - Supplementary Software 1 - Macro/
- M - Supplementary Software 1 - Macro/Supplementary Software 1 - Macro.ijm
